1 **No part gets left behind: Tiled nanopore sequencing of whole ASFV genomes**  
2 **stitched together using Lilo**

3

4 Running Title: Tiled amplicon sequencing with improved assembly of African Swine Fever  
5 Virus

6

7 Amanda Warr<sup>a</sup>, Caitlin Newman<sup>a</sup>, Nicky Craig<sup>a</sup>, Ingrida Vendelė<sup>a,♦</sup>, Rizalee Pilare<sup>b</sup>, Lilet  
8 Cariazo Cruz<sup>b</sup>, Twinkle Galase Barangan<sup>b</sup>, Reildrin G Morales<sup>d</sup>, Tanja Opriessnig<sup>a</sup>, Virginia  
9 Mauro Venturina<sup>b</sup>, Milagros R Mananggit<sup>c</sup>, Samantha Lycett<sup>a</sup>, Clarissa YJ Domingo<sup>b</sup>,  
10 Christine Tait-Burkard<sup>a#</sup>

11

12 <sup>a</sup>, The Roslin Institute and Royal (Dick) School of Veterinary Studies, University of  
13 Edinburgh, Easter Bush, Midlothian, UK

14 <sup>b</sup>, College of Veterinary Science and Medicine, Central Luzon State University, Science City  
15 of Muñoz, Nueva Ecija, The Philippines

16 <sup>c</sup>, Regional Animal Disease Diagnostic Laboratory, Department of Agriculture Regional Field  
17 Office III, City of San Fernando, Pampanga, The Philippines

18 <sup>d</sup>, Bureau of Animal Industry, Department of Agriculture, Visayas Avenue, Diliman, Quezon  
19 City, The Philippines

20

21 <sup>♦</sup>Current address: Thermo Fisher Scientific, Vilnius, Lithuania

22 <sup>#</sup> Address correspondence to Christine Tait-Burkard, [christine.burkard@roslin.ed.ac.uk](mailto:christine.burkard@roslin.ed.ac.uk) .

## 23 **Abstract**

24 African Swine Fever virus (ASFV) is the causative agent of a deadly, panzootic disease,  
25 infecting wild and domesticated suid populations. Contained for a long time to the African  
26 continent, an outbreak of a particularly infectious variant in Georgia in 2007 initiated the  
27 spread of the virus around the globe, severely impacting pork production and local  
28 economies. The virus is highly contagious and has a mortality of up to 100% in domestic  
29 pigs. It is critical to track the spread of the virus, detect variants associated with pathology,  
30 and implement biosecurity measures in the most effective way to limit its spread. Due to its  
31 size and other limitations, the 170-190kbp large DNA virus has not been well sequenced  
32 with fewer than 200 genome sequences available in public repositories. Here we present an  
33 efficient, low-cost method of sequencing ASFV at scale. The method uses tiled PCR  
34 amplification of the virus to achieve greater coverage, multiplexability and accuracy on a  
35 portable sequencer than achievable using shotgun sequencing. We also present Lilo, a  
36 pipeline for assembling tiled amplicon data from viral or microbial genomes without relying  
37 on polishing against a reference, allowing for structural variation and hypervariable region  
38 assembly other methods fail on. The resulting ASFV genomes are near complete, lacking  
39 only parts of the highly repetitive 3'- and 5'telomeric regions, and have a high level of  
40 accuracy. Our results will allow sequencing of ASFV at optimal efficiency and high  
41 throughput to monitor and act on the spread of the virus.

## 42 **Main**

43 African Swine Fever (ASF) is a viral hemorrhagic disease leading to an extremely high  
44 mortality of up to 100% within 7-10 days. Clinical signs of infection are non-specific,  
45 including fever, ataxia, anorexia, cyanosis, respiratory symptoms, gastrointestinal symptoms  
46 and death <sup>1</sup>. The causative agent of ASF is African Swine Fever Virus (ASFV), the only  
47 member of the *Asfivirus* genus and the *Asfarviridae* family. The virion is large and complex  
48 with a diameter of around 175-215nm containing a large, double stranded DNA genome of  
49 around 170-190kb encoding over 150 open reading frames <sup>1,2</sup>.

50 ASF is endemic in Africa where a sylvatic cycle between *Ornithodoros spp.* soft ticks and the  
51 natural reservoir, African wild suids, maintains its presence <sup>3</sup>. Other routes of infection and  
52 spread include physical contact, fluids, excretions, contaminated feed and fomites. The virus  
53 is extremely resilient and can survive for prolonged periods in a range of environmental  
54 conditions in carcasses and pork product. The disease is highly contagious and can be  
55 transmitted through relatively low infectious dose in feed and water <sup>4</sup>. Wild suid species are  
56 susceptible to disease but only domestic and feral pigs, as well as Eurasian wild boar show  
57 symptoms. ASFV is therefore very difficult to contain.

58 ASF was first discovered in East Africa, with symptoms reported in Kenya in 1914 and the  
59 disease described in 1921 <sup>5</sup>. Outbreaks in other parts of Africa, Europe, Brazil and the  
60 Caribbean islands occurred in the 20<sup>th</sup> century, with African countries being the worst  
61 affected. The virus was almost completely eradicated from non-African countries by the end  
62 of the century, but an outbreak in the Republic of Georgia in 2007 has since lead to  
63 widespread outbreaks in other countries. Since 2018 major outbreaks have been occurring  
64 in China, the world's largest pork producer, and it has been reported that up to half of the  
65 pigs in the country, representing roughly a quarter of the world's population, died or were  
66 culled to contain the outbreak in 2019 <sup>6</sup>. The spread of the virus in East and Southeast Asia  
67 however could not be halted and since further countries including Mongolia, Vietnam,  
68 Cambodia, North Korea, Laos and island nations including The Philippines, Indonesia,

69 Timor-Leste and Papua New Guinea have reported outbreaks <sup>7,8</sup>. After the initial outbreaks  
70 in Eastern Europe and continuing spread, the disease reached the European Union in 2014  
71 and continues to spread, not least through the wild boar population <sup>7,9</sup>. In late 2020 the virus  
72 reached the largest producer of pork in Europe, Germany <sup>10</sup>. The virus is also edging closer  
73 to the USA, one of the world's main exporters and importers of pork, having been recently  
74 detected in Haiti and the Dominican Republic, only 381km by air from the US territory of  
75 Puerto Rico. It is clear, that the disease represents a serious panzootic threat impacting the  
76 pork industry and threatening economies already shaken by the SARS-CoV-2 pandemic.

77 To understand the genetic and genomic variation for ASFV, sequencing is primarily focused  
78 on a roughly 400bp fragment of the B646L gene, encoding for the major capsid protein p72.  
79 This fragment, representing <0.25% of the total genome, is the basis of the current  
80 genotyping system, which has identified 24 genotypes so far <sup>11-14</sup>. To further discriminate,  
81 additional fragments of the E183L gene (p54, ~630bp), CP205L (p30, ~510bp), and B602L  
82 (gp83 ~800bp) are used, adding up to less than 1.4% of the genome characterized. Whilst  
83 being a DNA virus, antigenic diversity, the ability to acquire large deletions or insertions, and  
84 the presence of highly mutagenic hypervariable regions urge the need for whole genome  
85 sequencing for virus characterization and epidemiological studies <sup>15,16</sup>. To do this at the  
86 scale required, there is a need for a cheap and efficient method to sequence the large ASFV  
87 genome, whilst high abundance of homopolymers and hypervariable region require highest  
88 accuracy <sup>17</sup>.

89 The availability of a portable sequencing technology opens new doors to travel to outbreak  
90 locations, sequence, and analyze samples without needing to transport them. The MinION  
91 sequencer from Oxford Nanopore Technologies (ONT) can be carried easily in a pocket or  
92 carryon bag. This avoids complications of challenging transportation of biological samples,  
93 highly contagious agents or the requirement of a cold chain. There is the potential for a fast  
94 turnaround from sample collection to analysis, allowing for near live-monitoring of outbreak  
95 situations, as observed in during the Western African Ebola virus epidemic 2013-2016, or of

96 course the COVID-19 pandemic. Furthermore, multiplexing and the washing and reuse of  
97 the most expensive component of sequencing, the flow cells, allowing for cheaper  
98 sequencing than other methods. Finally, the sequencer can produce very long reads which  
99 improves assembly potential, particularly of highly repetitive genomes.

100 Whilst it is possible to obtain whole genome sequences of ASFV directly from blood- and  
101 tissue extract DNA, the high prevalence of pig DNA and the need for baits or other methods  
102 to enrich ASFV DNA render that method inapplicable for high-throughput, fast, sequencing.

103 Here, we present a method to sequence the near complete genomes, excluding only the  
104 highly repetitive, variable length telomeric 3' and 5' regions, of ASFV using ONT's MinION  
105 sequencing device using a tiled amplicon approach. The genome is amplified in 32 large  
106 fragments 7kb in length, amplified simultaneously in two PCR pools. We propose this  
107 method as an efficient, highly adaptable, more accurate, fast, and cost-effective option for  
108 sequencing of continuing ASFV outbreaks as well as historic samples. We present 10  
109 complete ASFV genome assemblies from samples from the early stages of the ASFV  
110 outbreak in the Philippines in 2019 assembled either with the tiled sequencing approach or a  
111 whole genome sequencing shotgun approach. The portability of Nanopore sequencing  
112 makes it ideal for exploring the dynamics of ASFV infections as outbreaks emerge. As ASFV  
113 continues to spread around the world, efficient methods of sequencing the genome are  
114 essential to improve our understanding of the virus and the ongoing global spread. Our  
115 primer sets have been optimized for relatively even coverage and have been designed to  
116 bind outside of hypervariable regions. They only anneal to roughly 0.8% of the genome and  
117 are designed to be well suited to the current outbreak, able to at least partially sequence  
118 other genotypes and be easily modifiable should the virus mutate.

119 Finally, we present the Lilo pipeline. While pipelines exist to assemble genomes from tiled  
120 amplicons, they rely on aligning reads to a reference and using polishing tools to generate a  
121 consensus from the reads. This method works well for producing a genome sequence with  
122 SNPs representative of the sequenced genome, however large indels, structural variants,

123 and hypervariable regions that may be difficult to align to a reference are not accurately  
124 represented. For ASFV, whole genes can be inserted or deleted and due to homologous  
125 recombination it can carry large structural variations, with indels likely being more important  
126 than SNPs in creating viral diversity<sup>18</sup>. Therefore, we designed Lilo, which aligns reads to a  
127 reference in order to assign them to an amplicon, selects the read with the highest base  
128 quality and of the expected length for each amplicon, polishes the read with the remaining  
129 reads, removes primers and stitches them together at overlaps ordered and oriented by a  
130 reference. This approach makes the pipeline more adaptable to large structural variation and  
131 hypervariable regions in genomes than currently available methods.

132

### 133 **Shotgun sequencing of ASFV directly from blood**

134 In field sequencing, particularly in developing countries, limits the availability of tools and  
135 reagents. During the first outbreaks in the Philippines whole DNA was isolated from the  
136 highly hemolysed blood collected from ASFV positive pigs. Samples were digested overnight  
137 with proteinase K at 55°C prior to phenol/chloroform/isoamyl alcohol extraction and  
138 precipitation with isopropanol before washing with 70% ethanol. Whole DNA samples were  
139 prepared for sequencing using the ligation sequencing kit (LSK) LSK109 before sequencing  
140 samples on a R9.4 flow cell using a MinION mk1b. The data were basecalled and  
141 demultiplexed using Guppy (ONT) and the reads assembled with Flye and polished with  
142 medaka. (Figure 1A)

143 The time between the beginning of sequencing and detection of the first ASFV read from  
144 whole blood ranged from 19 seconds to 3 minutes. As seen in the example of PHL-1969  
145 (Figure 1B) the percentage of reads that came from ASFV ranged from 0.006% to 0.24%,  
146 likely dependent on the viral titers of the animals culled. ASFV samples show a similar size  
147 distribution to other DNA found in the samples, if anything a second small peak of larger  
148 fragments can be observed (Figure 1C). All four sequenced blood samples assembled into a

149 whole genome, however, due to variable coverage, the number of mismatches and indels  
150 found in some of the samples were high (Figure 3B).

151

## 152 **Tiled amplicon sequencing of ASFV**

153 Given the low yield of ASFV sequences from shotgun sequencing, as demonstrated by us  
154 and others<sup>19-21</sup>, and the high expense per sample, this sequencing approach was not fit for  
155 purpose for high-throughput screening of an ongoing virus outbreak. Therefore, we  
156 developed a method to amplify, sequence, and assemble ASFV genomes from pigs.

157 In order to enrich ASFV from the sample easily, a PCR amplification approach was chosen,  
158 due to its ease of use and usually readily available tools in many countries and labs. Tiling  
159 primers were designed targeting 7kb amplicon length and 1kb amplicon overlap using primal  
160 scheme using a set of 26 ASFV reference sequences (Figure 2A). The primers are well  
161 suited to genotype II, from the current outbreak, but also cover the majority of the genome  
162 for at least genotypes I and IV (Figure 2B). This relatively long amplicon size was chosen to  
163 reduce the number of primer pairs but also to span potential hypervariable regions. After  
164 initial individual performance tests, several primers were redesigned from the original set of  
165 primers produced by primal scheme, however the majority of them worked well from the  
166 beginning. Fragments were amplified using the PCRBio VeriFi Hot Start high fidelity  
167 polymerase according to the manufacture's instruction. Following redesign, all primers  
168 amplified their targets, however, they did so at different efficiencies leading to uneven  
169 coverage over the genome. To test this, evenly concentrated pools of primers (pool 1 and  
170 pool 2, Figure 2A and Figure 2C) were used to amplify blood DNA extract samples from  
171 ASFV-infected pigs. Following initial amplifications, pools were split into three pools with  
172 primer pair 1, producing a shorter 4kb fragment continuously outperforming the others in a  
173 mixed reaction on its own, and primer concentrations in pool 1(Pair 1) and pool 2 were  
174 gradually adjusted according to their performance. PCR products per sample were

175 combined, libraries prepared using the LSK109 kit in an R9.4 flow cell. Figure 2D  
176 demonstrates the improvement that can be gained by tweaking primer concentrations from  
177 evenly represented primer pairs (purple) to optimized primer concentrations (green). These  
178 optimizations improve performance for multiplexing of multiple samples on one flow cell.

179 Fresher samples amplify more cleanly, but older, degraded samples will still amplify  
180 sufficiently. To show this, we highlight two samples; sample PHL-126, which has been  
181 heavily used and degraded, and sample PHL-261, which has been used less frequently  
182 (aliquot stored in freezer without frequent use) and is of better quality. As can be seen in the  
183 automated electrophoresis result of a tapestation (Figure 2E), PHL-126 shows poor  
184 amplification and relatively many amplicons <7kb. Good amplification can be seen for the  
185 shorter amplicon pair 1 still. PHL-261 on the other hand shows continued good amplification  
186 of the desired 7kb and 4kb products of pool 1 (odd), pool 2 (even) and pair 1, respectively.  
187 These samples were prepared with the LSK109 kit and multiplexed using native barcoding  
188 and run on a R9.4 flow cell with 3 other ASFV genomes having been pooled in  
189 representative quantities, the poorer amplification of PHL-126 had lower sequencing  
190 throughput than the better quality PHL-261, but was still assembled into a near-complete  
191 genome. Figure 2F shows sequencing coverage of the same two samples and the  
192 proportion of total reads for each that was assigned to each of the 32 amplicons.

193 The post-amplification DNA Integrity Number (DIN) can be used to help predict  
194 multiplexability, as different quality samples will impact the needed throughput. Figure 2G  
195 shows the relationship between the post-amplification DIN and throughput <3kb, and Figure  
196 2H demonstrates the number of gaps for different throughputs of reads >3kb. Samples PHL-  
197 126 (orange) and PHL-261 (blue) have been highlighted in pale (super accuracy base calling  
198 (SAC)) and strong (high accuracy base calling (HAC)) colors, respectively. Figure 2H  
199 demonstrates the required throughput per sample and the gaps that can be expected in  
200 genomes produced with lower throughputs. Assuming a theoretical MinION throughput of  
201 30GB, it should be possible to multiplex over 24 samples, and potentially up to 48 samples



202 (including PCR control), however we would recommend starting with fewer and assessing  
203 achievable throughput for each sequencing location as there is variability in expected  
204 throughput between users, flow cells, and geographical location. The integrity of the sample  
205 will also impact the throughput with degraded samples leading to sequencing capacity being  
206 taken up by shorter fragments instead of the required full length amplicons (Figure 2G). For  
207 very poor samples, more stringent size selection with AMPure XP beads prior to sequencing  
208 may be necessary if samples are to be multiplexed. While it is impractical to run an  
209 automated, high resolution electrophoresis, such as a tapestation, after every amplification,  
210 users can test a typical sample type (e.g. from decomposing wild boar, from farm culled pigs,  
211 with/without cold chain) to predict the likely multiplexability and clean-up steps of similar  
212 samples.

213

## 214 **Lilo assembly of genomes from tiled amplicons**

215 Comparing ASFV genomes we found major variation of the genome often originating from  
216 indels. Available assembly pipelines were struggling with such variation when it did not  
217 correspond to the reference sequence. Therefore, we developed the Lilo pipeline (Figure 3A)  
218 to assemble the tiled amplicons (<https://github.com/amandawarr/Lilo>). Whilst Lilo uses a  
219 reference alignment to sort the amplicons, it polishes against the highest quality reads rather  
220 than a reference sequence. Using this pipeline, highly accurate genomes were obtained with  
221 mismatch accuracy approaching Q50 when using SAC (Figure 2I) and indel accuracy up to  
222 Q40 when compared to a closely related publicly available ASFV genome assembly  
223 (MN715134.1)<sup>21</sup>, which may still be quite divergent from these samples in truth.

224 QUAST<sup>22</sup> (v5.0.2; quality assessment tool for genome assemblies) results demonstrate that  
225 the increased coverage of the tiled amplicons produced a more accurate assembly than  
226 shotgun sequencing of the virus using a whole flow cell sequencing directly from extracted  
227 DNA. Shotgun sequencing however, was able to highlight some samples with longer

228 telomeric regions, such as PHL-237, which is a clear advantage of long-read sequencing  
229 technology and something that should be explored for more in-detail investigations into the  
230 role of the ASFV telomeric regions. Overall, SAC produced fewer mismatches and indels  
231 than HAC and should be the preferred method, however, the time for base calling is a trade-  
232 off. Samples with high percentages of unassigned bases (N's) clearly correspond to DIN  
233 numbers (Figure 3B).

234 The assembled genomes had excellent agreement on genome structure with the same  
235 samples assembled from shotgun sequencing (Figures 3B & 3C). The repetitive content  
236 shown at the edges of Figures 3B and 3C are sequences from the telomeres, showing that  
237 despite the sequences being from tiled amplicons, they do cover the majority of the genome  
238 and part of the telomeres.

239

#### 240 **Accuracy of Lilo and ARTIC assembled genomes**

241 We assessed the quality of Lilo assemblies against those produced with the ARTIC pipeline  
242 (v1.2.1). A selection of the ASFV sequencing data were assembled using the ARTIC  
243 pipeline, as well as using Lilo, both using the assembled shotgun sequence PHL-1969 as a  
244 reference.

245 QUAST analysis shows lower numbers of mismatches against the closest reference  
246 (MN715134.1) but higher indels. The percentage of unassigned bases is much higher for  
247 ARTIC at around 2.4% whereas Lilo is at 0 or nearly 0%.(Figure 3B)

248 Comparing Lilo-assembled genomes and ARTIC-assembled genomes to a reference  
249 (MN715134.1) a number of indels can be observed. Figure 4A shows a likely real indel in the  
250 PHL ASFV samples which all assemblies agree on and which is well supported by the reads.  
251 In contrast, Figure 4B shows the only indel unique to almost all of the assemblies produced  
252 by the Lilo pipeline while being absent from all artic assemblies and occurs in a  
253 homopolymer, Most reads appear to support the deletion assembled by Lilo, whether this is

254 a real sequence or a result of poor accuracy of Nanopore sequencing of homopolymeric  
255 regions is a more difficult question. Figure 4C shows an extreme example of a very long  
256 homopolymeric region, ASFV has several of these and typically neither assembly method  
257 agrees on the length of the homopolymer, with the reads lending no strong support to either  
258 assembly. While errors from the Lilo pipeline tended to be randomly dispersed among  
259 homopolymers, ARTIC errors tended to be more systematic, appearing consistently across  
260 the assembled genomes. Frequently, homopolymers lead to the ARTIC pipeline replacing  
261 the base immediately before the homopolymer and the first base of the homopolymer with a  
262 pair of N's, as can be seen in Figure 4E and 4F. There were also occasions when reads did  
263 not support an indel, and there wasn't a clear cause of an indel in the reads or reference, as  
264 can be seen in Figures 4D and 4E. There are several of these types of indels throughout the  
265 assembly, where Lilo assemblies better agree with both the reads and the reference, likely  
266 contributing to the lower QUILT scores of ARTIC on homopolymers and the percentage of  
267 undefined bases.

268

## 269 **Phylogenomics**

270 A maximum likelihood phylogenomic tree was constructed incorporating the newly  
271 assembled genomes from tiled data of R9.4 flow cells with HAC with publicly available whole  
272 genome ASFV sequences using iqtree (v2.0.5; Figure 5A), and for B646L gene, encoding for  
273 the major capsid protein p72, genotype II sequences specifically (Figure 5B).

274 As observed in Figure 5A, p72 genotypes do not correspond to the clustering. For example,  
275 the E75 strain Spain 1975 isolate, an early genotype II, is grouping with genotype I's.

276 Unfortunately, the phylogeny contains many gaps and lacks both timely and geographic  
277 resolution, showing that much more sampling is required. PHL samples clearly cluster within  
278 the highly virulent, novel p72 genotype II cluster.

279 Resolving the tree further, selecting only those clustering with the novel p72 genotype II  
280 genomes two distinct clusters of PHL sequences can be observed. Whilst, due to the  
281 similarity of the genomes, the orders of lower branches are of lower confidence than those of  
282 higher branches, reanalysis still suggest two different introductions into the Philippines  
283 (internal branch lengths may be found in supplementary documents S1 and S2). Whilst  
284 indications are that one cluster is closer related to Asian isolates, the other one showing a  
285 more likely Eastern European origin, the lack of sample numbers to fill branch gaps and  
286 common ancestors makes conclusive interpretation impossible.

## 287 Discussion

288 ASFV is a serious threat to the global pork industry and consequences of depopulation,  
289 reduced availability of pork, and increased prices of other animal protein affect local  
290 economies, especially in low- and middle income countries with high reliance on pig protein.  
291 Tracing the spread of the virus, understanding more about genome-pathology links, and  
292 consequently implementing targeted biosafety measures are paramount to combat the  
293 disease. As demonstrated in Figure 5, current genotyping methods based on partial  
294 sequencing of the B646L gene, encoding for the major capsid protein p72, do not  
295 correspond to whole-genome sequencing and are therefore inadequate to trace virus  
296 evolution.

297 Here, we have demonstrated an efficient method for sequencing the ASFV genome. Despite  
298 the use of tiled amplicons, part of the 3'- and 5' telomeric regions of the virus are included in  
299 the tiled amplicon assemblies, meaning the majority of the genome is included.

300 As demonstrated by us and others, ASFV sequences can be obtained by direct sequencing  
301 from blood or other tissue samples of infected pigs<sup>19-21</sup>. The resulting sequence includes  
302 interesting information on the lengths and repeats found in the telomeric regions, which may  
303 be helpful for more in-depth investigation into the virus pathology and spread. However,  
304 without enrichment for ASFV<sup>17</sup> or depletion of host-methylated DNA<sup>23</sup> sample percentage  
305 for ASFV is low relative to host DNA in the samples, meaning that obtaining sufficient ASFV  
306 reads to assemble the genome from shotgun sequencing usually requires an entire MinION  
307 flow cell, or more, depending on viral titer and original sample type. Bone marrow or blood  
308 will likely yield the best virus:host ratio with spleen or muscle, whilst good sources of viral  
309 DNA<sup>24</sup>, also contain a large number of nucleated host cells. Even if sufficient data is  
310 obtained to assemble the genome, the coverage is likely too poor to sufficiently polish the  
311 genome. In contrast, the tiled amplicon method can be used on samples with lower viral  
312 titers or degraded DNA, selectively sequences the virus, and can be multiplexed on a flow  
313 cell to simultaneously sequence multiple samples at high enough coverage for good

314 polishing. Especially in countries where ASFV is circulating in wild boar or feral pigs,  
315 samples may be collected from infected animals that have been dead for a prolonged period  
316 of time. It is important that the method is capable of amplifying virus from both high- and low  
317 quality samples. Figure 2E demonstrates the variability of DNA integrity post-amplification  
318 and that even poor samples that have been degraded amplify and produce near complete  
319 genome assemblies.

320 Overall, the PCR amplification method increases coverage, is less prone to exhaust flow  
321 cells quickly, allows for multiplexing, and consequently reduces costs, improves genome  
322 accuracy, and removes the need for specialized enrichment or depletion methods.

323 Whilst ~7kb amplicons are very large compared to other comparable methods for other  
324 viruses, the size of the ASFV genome, the stability of DNA, the relatively low numbers of  
325 primer pairs, and the advantages of long reads detecting recombinants more easily make  
326 this the best approach. Especially with the small, medium, and large indels that can occur in  
327 ASFV<sup>18</sup>, it is important to get good resolution across these regions, which can be achieved  
328 easily with large amplicons. It is important though to choose the right, high accuracy  
329 polymerase capable of amplifying such long amplicons. We found PCRBio VeriFi to be  
330 highly capable of this with the hot start version producing very few non-specific products,  
331 whilst the non-hot start version can produce more non-specific product, which may be an  
332 advantage for variant testing. As demonstrated in Figures 2E and F and 4B show that even  
333 low quality samples can produce whole genome assemblies with few gaps. However, a  
334 limitation of the large tiled amplicon method is that should a variant occur at the site of a  
335 primer, the amplification of a relatively large section of genome will fail. While this is an  
336 inconvenience, it will be simple to redesign a primer to replace the failed one or to act as an  
337 alternate primer. It is also possible to amplify across a larger region using the existing  
338 primers either side of the failed one, generating a 14kb product, to sequence a larger region  
339 and design a primer from the sequenced amplicon. This was found to be possible using the  
340 VeriFi HS polymerase and allows for the method to adapt as the virus changes.

341 Whilst Nanopore sequencing methods provide a lot of advantages, such as sequencing on  
342 site, portability, and accessibility to less specialist communities, there are, as for any  
343 sequencing method, drawbacks.

344 As demonstrated in Figure 1I & 1J the choice of flow cell and basecalling method has an  
345 impact on the accuracy of SNPs and indels. Generally, throughput is lower and required  
346 input DNA is higher for R10.3 flow cells, however HAC on R10.3 is of comparable accuracy  
347 to SAC on R9.4, with super accuracy on R10.3 being of even higher quality. SAC is very  
348 slow and resource hungry, and when speed is important such as in an active outbreak,  
349 R10.3 with HAC may be a good compromise for maximising efficiency with minimal sacrifice  
350 of accuracy. However where the highest accuracy is required we recommend using R10.3  
351 flow cells and basecalling with a super accuracy model.

352 All of our assemblies have indels compared to the reference partially stemming from  
353 systematic errors in Nanopore sequencing in the abundant homopolymers and repeats in the  
354 ASFV genome (e.g. PHL-1969 contains 6.8% homopolymers of 4bp or more), however with  
355 the latest kits and flow cells from Nanopore, and without additional costs, we would expect  
356 future developments to continually reduce the indel errors without major alterations to the  
357 wet or dry lab methodologies described here. Additionally, some indels are likely true  
358 variations, and in many cases these indels are clearly present across all of our genomes  
359 (Figure 4A), and are not in homopolymeric regions, suggesting true variation between  
360 samples and the reference used. Additional sequencing of the same amplicons with a higher  
361 accuracy technology, such as Illumina could be used to polish the assemblies, however this  
362 would add time and cost. Reducing the number of false indels, where possible, is important,  
363 as the ASFV genome is known to have functionally relevant indels<sup>25</sup>. Polishing with an  
364 accurate reference can produce assemblies that are very accurate, however, these methods  
365 do not handle structural variants and hypervariable regions well. While the genomes  
366 sequenced here do not have any major indels compared to the reference used, diversity in  
367 ASFV is partially driven by small, medium and large indels<sup>18</sup> and increased sequencing of

368 samples is likely to reveal more of them. While errors from the Lilo pipeline tended to be  
369 randomly dispersed among homopolymers, ARTIC errors tended to be more systematic,  
370 appearing consistently across the assembled genomes. Errors occurring in the same  
371 position between genomes may be more likely to impact phylogenomic analysis than  
372 relatively random errors. The only consistent indel error found across the majority of the Lilo  
373 assembled genomes that was always absent in the artic genomes is shown in Figure 4B.  
374 This region contains a homopolymers, which is typically difficult to correct from Nanopore  
375 sequencing data, however while the ARTIC assembly more closely agrees with the  
376 reference, the reads are well-supporting of the deletion found in the Lilo assemblies. It is not  
377 unusual when carrying out multi-sequence alignments between whole ASFV genome  
378 sequences, even those constructed from reads from a higher accuracy sequencing  
379 technology, to find large homopolymers of variable length and it is unclear to what degree  
380 these are limitations of sequencing technologies as opposed to real variation.

381 The Lilo pipeline also has some limitations, it currently assumes that any structural variants  
382 will not change the length of any given amplicon by more than 5%, it assumes that structural  
383 variants will not be dramatic enough to prevent alignment to the reference for the purposes  
384 of assigning reads to amplicons and ordering and orienting the polished amplicons. Lilo also  
385 assumes the reads will be the full length of the amplicon, making it incompatible with ONT  
386 rapid kits that utilize transposases. However, the strength of not relying on polishing reads  
387 aligned to a reference is beneficial for genomes where structural variation is expected to be  
388 important, and for species with hypervariable regions which may not align and polish well  
389 with a reference. The pipeline has been tested on tiled sequences from ASFV, Porcine  
390 Reproductive and Respiratory Syndrome-1 & -2, and SARS-CoV-2 (data not shown here)  
391 and can handle custom schemes for other viruses.

392 ASFV is very under-sequenced with only a small number of whole genome sequences  
393 available and there is a need for an affordable way to sequence the virus at scale, as  
394 previously discussed <sup>17</sup>. While the majority of sequences produced from sequencing



395 individual genes in the virus have been frustratingly similar <sup>26</sup> reducing their usefulness in  
396 epidemiological studies, variants and large deletions have been observed across the  
397 genome, and these have been found to affect phenotypes <sup>25</sup>. As outbreaks continue to  
398 spread around the world and the amount of virus in circulation increases, these variations  
399 will likely increase in frequency. Additionally, there are few of the ancestral viruses from  
400 Africa sequenced, and these should be sequenced to understand the evolution of ASFV,  
401 particularly the loss of its dependence on the sylvatic cycle. Given the slow mutational rate of  
402 the virus, sequencing individual genes is unlikely to be informative and so to have a chance  
403 of seeing variants in the virus the whole genome must be sequenced. The ability to amplify  
404 the genotypes with our current scheme decreases with distance from genotype II, and  
405 additional primers will need designing in the future to improve coverage over other  
406 genotypes, however current coverage using this primer scheme is still likely to be of more  
407 use than the p72 gene alone. Coverage gaps can be resolved relatively easily as larger  
408 amplicons can be generated with flanking primers. Should primers on older or emerging  
409 samples fail, the altered region can be amplified using primers from either side of the failed  
410 amplicon, spanning the region, and the sequenced amplicon can be used to design new  
411 primers for the region.

412 Phylogenetic trees of currently available whole-genome ASFV sequences highlight the  
413 inadequacy of the p72 genotyping in reflecting similarities of ASFV on a genomic level. The  
414 sparsity of whole-genome sequences hampers the ability to trace virus movement and  
415 results in high levels of uncertainty in phylogenetic analyses. Running the maximum  
416 likelihood tree analysis including the whole-genome sequences obtained from tiled  
417 amplification in this manuscript reliably grouped samples from the early Philippines outbreak  
418 of ASFV in November 2019 into two clusters. This indicates at least two potential  
419 introductions of ASFV into the Philippines. Due to the lack of samples and resolution in the  
420 phylogenetic tree, no conclusion about countries or region of origins is possible.

421 We have presented an efficient, low cost method for sequencing and assembling ASFV  
422 which can be carried out in the lab or in the field during outbreaks. The Lilo pipeline is a  
423 lightweight pipeline that can be run on a standard laptop with 16GB RAM and no internet  
424 connection, making it ideal for in field bioinformatic analysis of ASFV and other viruses.

## 425 **Methods**

### 426 **Samples**

427 Blood samples from outbreaks in central Luzon (Philippines) were collected following  
428 depopulation of pigs within a defined containment radius. Blood samples were tested for  
429 ASFV by PCR. Blood samples from ASFV-positive pigs were pooled at equal amounts by  
430 farm before further processing.

### 431 **DNA extraction**

432 Blood samples were spun for 20min at 3,000rcf before decanting the supernatant. 5xTEN  
433 buffer(0.05M EDTA, 0.5M NaCl, 20mg/ml Proteinase K, 20% SDS, in 0.05M Tris-HCl,  
434 pH8.0) were added to a 1x final concentration before incubation overnight at 55°C in a  
435 shaking water bath. Equal volumes of phenol were added and gently mixed. Following 20min  
436 centrifugation at 3,000rcf the aqueous phase was transferred to a fresh tube. If the phase  
437 was very viscous, the phenol phase was re-extracted to improve yields. An equal volume of  
438 phenol/chloroform/isoamyl alcohol (25:24:1) was added to the aqueous phase before mixing  
439 and separation by centrifugation, 10min, 3,000rcf. The aqueous phase was transferred to a  
440 fresh tube before addition of 1:10 3M sodium acetate and an equal amount of isopropanol.  
441 Following 1h incubation at -20°C, samples were spun for 10min at 16,000rcf before washing  
442 the pellet with 70% Ethanol. The pellet was dried and resuspended in nuclease-free water.

### 443 **Nanopore sequencing directly from DNA extracted from blood in the Philippines**

444 Samples were sequenced following Nanopore's SQK-LSK109 protocol on R9.4 flow cells on  
445 a MinION mk1b. The protocol was started with 1ug of DNA as measured on an Implen  
446 NanoPhotometer P330. The protocol was carried out as recommended by ONT with the  
447 following modifications: The 20°C and 60°C incubations after the addition of NEB's FFPE  
448 repair and End-prep reagents were done for 30 minutes at each temperature instead of 5  
449 minutes, and the room temperature incubation for the ligation reaction was done for 20  
450 minutes instead of 10. During sequencing, two USB desk fans were pointed at the MinION to

451 assist with maintaining appropriate temperature for the run in the above average “room  
452 temperature” in the lab in the Philippines.

### 453 **Designing primers for tiled amplification**

454 Tiled primers were designed using Primal Scheme (v1.3.2)<sup>27</sup>. A set of 28 complete African  
455 Swine Fever genomes (listed in Supplementary Document S3) were downloaded from NCBI  
456 for primer design, which at the time were all that were available. Additionally three Filipino  
457 whole ASFV genomes we had assembled from shotgun sequencing data were included. A  
458 multi sequence alignment was carried out with Clustal Omega (in MEGA v7.0.2)<sup>28</sup>. Primal  
459 Scheme was run to produce 7kb amplicons with 1kb overlap resulting in 32 overlapping  
460 primer pairs in two non-overlapping pools. Primers were tested on samples and while the  
461 majority worked first time, several had to be redesigned due to failed amplification or  
462 preferential amplification of off-target regions. Redesigns were done using Primer-BLAST<sup>29</sup>,  
463 targeting a similar region of the genome to the failed amplicon. Some primers amplified more  
464 efficiently than others and in order to make the coverage of these as even as possible, some  
465 primers were tweaked to have a different concentration. One primer pair (amplicon 1) was  
466 shorter than the others in order to avoid highly repetitive sequence in the telomeres and it is  
467 recommended to amplify it in a separate reaction to pools 1 and 2 to avoid  
468 overrepresentation.

### 469 **Amplification, library prep and sequencing of tiled amplicons**

470 Tiled primers were initially tested individually at 200nM concentration using approximately  
471 90ng ASF DNA and Phusion High-Fidelity PCR Master Mix with HF Buffer with 1mM added  
472 MgCl<sub>2</sub> (both New England Biolabs, Ipswich, MA, USA). Individual PCRs, in a 25µl reaction  
473 volume, underwent initial denaturation of 2 minutes at 98°C, followed by 33 cycles of 10  
474 seconds at 98°C, 30 seconds annealing at 63°C, and 4 minutes and 40 seconds extension  
475 at 72°C, followed by a final extension for 10 minutes at 72°C. PCR products were then  
476 examined using Tapestation Genomic DNA analysis (Agilent, Santa Clara, CA, USA). While

477 a small amount of off-target amplification was tolerated, primers which produced strong off-  
478 target bands or weak bands of the correct 7kb size were redesigned.

479 Once the complete set of primers had been successfully designed to cover the complete  
480 genome, the primers were pooled in equal amounts into two pools of non-overlapping  
481 primers. These pools were tested using the same conditions as the individual PCRs, but in a  
482 50 $\mu$ l reaction volume and using 1 $\mu$ M of the primer pool. The resulting PCR products were  
483 cleaned using 0.4 $\times$  volume AMPure XP beads (Beckman Coulter, Indianapolis, IN, USA) to  
484 remove products smaller than approximately 2kb in length, then pooled equally prior to  
485 sequencing. The cleaned PCR products were quantified using a Qubit ds DNA BR assay  
486 (Invitrogen, Waltham, MA, USA) and combined in equimolar amounts to a total of 700ng for  
487 library preparation according to the Native barcoding genomic DNA (with EXP-NBD104,  
488 EXP-NBD114, and SQK-LSK109)-Nanopore protocol.

489 Following bioinformatic analysis of sequencing data, primers which were found to be over- or  
490 under-performing were either redesigned or their contribution to the pool was adjusted  
491 accordingly, and the new primer pool tested as above in an iterative fashion. Ultimately 2  
492 non-overlapping pools and a separate reaction for primer pair 1 were used to obtain the  
493 most even coverage and were processed as above, and pooled proportionally to the number  
494 of amplicons in each pool prior to sequencing. Additionally the polymerase was swapped  
495 from Phusion to VeriFi (PCRBIO) in a 25 $\mu$ l reaction using 2 $\mu$ l DNA per reaction, which has  
496 markedly better performance on the amplicons with far less off-target amplification. The PCR  
497 conditions for this polymerase were an initial denaturation of 1 minute at 98 $^{\circ}$ C, followed by  
498 40 cycles of 15 seconds at 98 $^{\circ}$ C, 15 seconds annealing at 60 $^{\circ}$ C, and 4 minutes and 40  
499 seconds extension at 72 $^{\circ}$ C, followed by a final extension for 5 minutes at 72 $^{\circ}$ C. AMPure XP  
500 bead cleanup after PCR is optional, but recommended in samples with low DIN. Primer  
501 sequences, recommended primer concentrations and recommended pooling quantities are  
502 described in supplementary table S1, and any updates to these will be released on Lilo's  
503 github page.

504 Samples were sequenced following Nanopore's SQK-LSK109 or SQK-LSK110 protocol on  
505 R9.4 or R10.3 flow cells (which combination is specified alongside relevant results) on a  
506 MinION mk1b or mk1c. The protocol was started with 1ug of pooled amplicons as measured  
507 on a qubit using broad range reagents. For samples using multiplexing, the native barcoding  
508 expansion kit from Nanopore was used following Nanopore's instructions when using SQK-  
509 LSK109. For using the barcodes with SQK-LSK110, the instructions for SQK-109 were  
510 followed until after the barcodes had been ligated on, at which stage the end prep was  
511 repeated and we follow the standard protocol for library prep with SQK-LSK110 from after  
512 the end prep step.

### 513 **Bioinformatic processing of ASFV genomes sequenced with shotgun sequencing**

514 The data were basecalled and demultiplexed using MinKNOW (v19.06.8; ONT) using "fast"  
515 basecalling. Following basecalling the reads were aligned to an ASFV genome using  
516 minimap2 to identify ASFV reads, the fast5s for these reads were extracted using  
517 fast5\_subset from the ont\_fast5\_api ([https://github.com/nanoporetech/ont\\_fast5\\_api](https://github.com/nanoporetech/ont_fast5_api)) and  
518 these were basecalled again using high accuracy basecalling. This was done to reduce  
519 basecalling time, as this work was done locally in the field on a laptop without a GPU. The  
520 reads were assembled with Flye (v2.6)<sup>30</sup> and polished 3 times with Medaka (v0.7.1; ONT).  
521 Comparisons of quantity of data produced and the proportion of which were ASFV reads  
522 were done using NanoComp (v1.28.1)<sup>31</sup>.

### 523 **Bioinformatic processing of ASFV genomes from tiled amplicons with Lilo**

524 The data were basecalled and demultiplexed using Guppy (v5.0.14; ONT) using high or  
525 super accuracy model on a GPU. The snakemake pipeline, Lilo  
526 (<https://github.com/amandawarr/Lilo>), was developed and as summarised in Figure 3A,  
527 takes the following steps:

- 528 1. Use Porechop (v0.2.3) to remove any sequencing adapters or barcodes that have  
529 made it through demultiplexing.

- 530 2. Align to a reference with minimap2 (v2.22)<sup>32</sup> and samtools (v1.12)<sup>33</sup> and separate  
531 reads into amplicons by alignment position with bedtools (v2.30.0).<sup>34</sup>
- 532 3. Select reads of the expected amplicon length (+/-5%) and subset to 300X
- 533 4. Select the read with highest average base quality within +/-1% of the median length  
534 of reads for the amplicon to be the “reference” (with bioawk v1);  
535 <https://github.com/lh3/bioawk>), remove any amplicons with fewer than 40 reads.  
536 Targeting the median length allows for flexibility for large insertions or deletions.
- 537 5. Pool amplicon reads and references back into their original non-overlapping pools.
- 538 6. Polish the pools 3x with medaka (v1.4.4; ONT) and combine resulting polished  
539 amplicons.
- 540 7. Align to the reference with minimap2 and remove soft clipped bases (these likely  
541 represent missed barcodes or adapters)
- 542 8. Run porechop (specific fork: <https://github.com/sclamons/Porechop-1>) to remove  
543 primers from the amplicons.
- 544 9. Merge the amplicons with scaffold\_builder (v2.3)<sup>35</sup>.

545 The required input to Lilo are demultiplexed reads in fastq format in a directory named  
546 “raw”, a reference fasta, a bed file of primer alignments (as output by primal scheme), and a  
547 csv of primer sequences (if there are ambiguous bases it is advised to expand them first)  
548 and a config file, described on the github page. It is adaptable to any species (with a single  
549 genome fragment/chromosome) with any tiled primer scheme. The pipeline outputs a fasta  
550 file containing the assembled genome.

### 551 **ARTIC assemblies**

552 A subset of genomes were also assembled using the Artic pipeline  
553 (<https://artic.network/ncov-2019>; v1.2.1) following the bioinformatics SOP using the medaka  
554 method.

### 555 **Quality control of assembled genomes**

556 Quast (v5.0.2) was used to compare the assembled genomes to the most closely related  
557 publicly available ASFV assembly according to BLAST alignment (MN715134.1)<sup>21</sup>. Samples  
558 where both WGS and tiled sequencing were used were compared for overall structure using  
559 nucmer (v4.0.0beta2)<sup>36</sup>.

## 560 **Phylogeny**

561 The phylogeny analysis was limited to the tiled genomes, as these were the most accurate  
562 assemblies, and publicly available genomes. These were aligned using Mafft (v7.467)<sup>37</sup> and  
563 maximum likelihood trees constructed using iqtree (v2.0.5)<sup>38</sup>.

564



## 565 **Acknowledgments**

566 We would like to thank the Bureau of Animal Industry and Milagros Mananggit for providing  
567 us access to the valuable ASFV blood samples. We would also like to thank Central Luzon  
568 State University and Clarissa Yvonne Domingo and Virginia Venturina and their families for  
569 their amazing hospitality during all our visits to the Philippines.

570 We acknowledge financial support from the BBSRC Institute Strategic Programme grant  
571 funding to The Roslin Institute (BBS/E/D/20241866, BBS/E/D/20002172, and  
572 BBS/E/D/20002174) and BBSRC / Newton Fund Swine and Poultry research initiative grant  
573 (BB/R013187/1).

## 574 **Author Contributions**

575 Outlined the study AW, NC, IV, CYJD, CTB; collected and provided samples RGM, MRM,  
576 CYJD; performed experiments AW, NC, CN, IV, RP, LCC, TGB, and CTB; analyzed data  
577 AW, NC, SL, and CTB; interpreted data AW, NC, CN, SL, VMV, CYJD and CTB; wrote  
578 manuscript, AW and CTB, with contribution of other authors.

## 579 **Competing Interests Statement**

580 The authors declare no competing interests.

## 581 References

- 582 1 Blome, S., Franzke, K. & Beer, M. African swine fever – A review of current  
583 knowledge. *Virus Research* **287**, 198099, doi:10.1016/j.virusres.2020.198099 (2020).
- 584 2 Sánchez-Vizcaíno, J. M., Mur, L., Gomez-Villamandos, J. C. & Carrasco, L. An  
585 Update on the Epidemiology and Pathology of African Swine Fever. *Journal of*  
586 *Comparative Pathology* **152**, 9-21, doi:10.1016/j.jcpa.2014.09.003 (2015).
- 587 3 Jori, F. *et al.* Review of the sylvatic cycle of African swine fever in sub-Saharan Africa  
588 and the Indian ocean. *Virus Res* **173**, 212-227, doi:10.1016/j.virusres.2012.10.005  
589 (2013).
- 590 4 Niederwerder, M. C. *et al.* Infectious Dose of African Swine Fever Virus When  
591 Consumed Naturally in Liquid or Feed. *Emerg Infect Dis* **25**, 891-897,  
592 doi:10.3201/eid2505.181495 (2019).
- 593 5 Eustace Montgomery, R. On A Form of Swine Fever Occurring in British East Africa  
594 (Kenya Colony). *Journal of Comparative Pathology and Therapeutics* **34**, 159-191,  
595 doi:[https://doi.org/10.1016/S0368-1742\(21\)80031-4](https://doi.org/10.1016/S0368-1742(21)80031-4) (1921).
- 596 6 Tian, X. & von Cramon-Taubadel, S. Economic consequences of African swine fever.  
597 *Nature Food* **1**, 196-197, doi:10.1038/s43016-020-0061-6 (2020).
- 598 7 Penrith, M. L. Current status of African swine fever. *CABI Agriculture and Bioscience*  
599 **1**, 11, doi:10.1186/s43170-020-00011-w (2020).
- 600 8 Mighell, E. & Ward, M. P. African Swine Fever spread across Asia, 2018-2019.  
601 *Transbound Emerg Dis* **68**, 2722-2732, doi:10.1111/tbed.14039 (2021).
- 602 9 Gaudreault, N. N., Madden, D. W., Wilson, W. C., Trujillo, J. D. & Richt, J. A. African  
603 Swine Fever Virus: An Emerging DNA Arbovirus. *Front Vet Sci* **7**, 215,  
604 doi:10.3389/fvets.2020.00215 (2020).
- 605 10 Sauter-Louis, C. *et al.* Joining the club: First detection of African swine fever in wild  
606 boar in Germany. *Transbound Emerg Dis* **68**, 1744-1752, doi:10.1111/tbed.13890  
607 (2021).
- 608 11 Bastos, A. D. *et al.* Genotyping field strains of African swine fever virus by partial p72  
609 gene characterisation. *Arch Virol* **148**, 693-706, doi:10.1007/s00705-002-0946-8  
610 (2003).
- 611 12 Quembo, C. J., Jori, F., Vosloo, W. & Heath, L. Genetic characterization of African  
612 swine fever virus isolates from soft ticks at the wildlife/domestic interface in  
613 Mozambique and identification of a novel genotype. *Transbound Emerg Dis* **65**, 420-  
614 431, doi:10.1111/tbed.12700 (2018).
- 615 13 Boshoff, C. I., Bastos, A. D., Gerber, L. J. & Vosloo, W. Genetic characterisation of  
616 African swine fever viruses from outbreaks in southern Africa (1973-1999). *Vet*  
617 *Microbiol* **121**, 45-55, doi:10.1016/j.vetmic.2006.11.007 (2007).
- 618 14 Achenbach, J. E. *et al.* Identification of a New Genotype of African Swine Fever Virus  
619 in Domestic Pigs from Ethiopia. *Transbound Emerg Dis* **64**, 1393-1404,  
620 doi:10.1111/tbed.12511 (2017).
- 621 15 Malogolovkin, A. & Kolbasov, D. Genetic and antigenic diversity of African swine  
622 fever virus. *Virus Res* **271**, 197673, doi:10.1016/j.virusres.2019.197673 (2019).
- 623 16 Netherton, C. L., Connell, S., Benfield, C. T. O. & Dixon, L. K. The Genetics of Life  
624 and Death: Virus-Host Interactions Underpinning Resistance to African Swine Fever,  
625 a Viral Hemorrhagic Disease. *Front Genet* **10**, 402, doi:10.3389/fgene.2019.00402  
626 (2019).
- 627 17 Forth, J. H., Forth, L. F., Blome, S., Höper, D. & Beer, M. African swine fever whole-  
628 genome sequencing—Quantity wanted but quality needed. *PLOS Pathogens* **16**,  
629 e1008779, doi:10.1371/journal.ppat.1008779 (2020).
- 630 18 Zhu, Z. *et al.* Homologous recombination shapes the genetic diversity of African  
631 swine fever viruses. *Veterinary Microbiology* **236**, 108380,  
632 doi:<https://doi.org/10.1016/j.vetmic.2019.08.003> (2019).

- 633 19 Jia, L. *et al.* Nanopore sequencing of African swine fever virus. *Sci China Life Sci* **63**,  
634 160-164, doi:10.1007/s11427-019-9828-1 (2020).
- 635 20 O'Donnell, V. K. *et al.* Rapid Sequence-Based Characterization of African Swine  
636 Fever Virus by Use of the Oxford Nanopore MinION Sequence Sensing Device and a  
637 Companion Analysis Software Tool. *J Clin Microbiol* **58**, doi:10.1128/JCM.01104-19  
638 (2019).
- 639 21 Olasz, F. *et al.* Short and Long-Read Sequencing Survey of the Dynamic  
640 Transcriptomes of African Swine Fever Virus and the Host Cells. *Front Genet* **11**,  
641 758, doi:10.3389/fgene.2020.00758 (2020).
- 642 22 Gurevich, A., Saveliev, V., Vyahhi, N. & Tesler, G. QUAST: quality assessment tool  
643 for genome assemblies. *Bioinformatics* **29**, 1072-1075,  
644 doi:10.1093/bioinformatics/btt086 (2013).
- 645 23 O'Donnell Vivian, K. *et al.* Rapid Sequence-Based Characterization of African Swine  
646 Fever Virus by Use of the Oxford Nanopore MinION Sequence Sensing Device and a  
647 Companion Analysis Software Tool. *Journal of Clinical Microbiology* **58**, e01104-  
648 01119, doi:10.1128/JCM.01104-19 (2021).
- 649 24 Fischer, M., Huhr, J., Blome, S., Conraths, F. J. & Probst, C. Stability of African  
650 Swine Fever Virus in Carcasses of Domestic Pigs and Wild Boar Experimentally  
651 Infected with the ASFV "Estonia 2014" Isolate. *Viruses* **12**, doi:10.3390/v12101118  
652 (2020).
- 653 25 Gallardo, C. *et al.* Attenuated and non-haemadsorbing (non-HAD) genotype II African  
654 swine fever virus (ASFV) isolated in Europe, Latvia 2017. *Transbound Emerg Dis* **66**,  
655 1399-1404, doi:10.1111/tbed.13132 (2019).
- 656 26 Gallardo, C. *et al.* Genetic variation among African swine fever genotype II viruses,  
657 eastern and central Europe. *Emerging infectious diseases* **20**, 1544-1547,  
658 doi:10.3201/eid2009.140554 (2014).
- 659 27 Quick, J. *et al.* Multiplex PCR method for MinION and Illumina sequencing of Zika  
660 and other virus genomes directly from clinical samples. *Nature Protocols* **12**, 1261-  
661 1276, doi:10.1038/nprot.2017.066 (2017).
- 662 28 Sievers, F. *et al.* Fast, scalable generation of high-quality protein multiple sequence  
663 alignments using Clustal Omega. *Mol Syst Biol* **7**, 539, doi:10.1038/msb.2011.75  
664 (2011).
- 665 29 Ye, J. *et al.* Primer-BLAST: A tool to design target-specific primers for polymerase  
666 chain reaction. *BMC Bioinformatics* **13**, 134, doi:10.1186/1471-2105-13-134 (2012).
- 667 30 Kolmogorov, M., Yuan, J., Lin, Y. & Pevzner, P. A. Assembly of long, error-prone  
668 reads using repeat graphs. *Nature Biotechnology* **37**, 540-546, doi:10.1038/s41587-  
669 019-0072-8 (2019).
- 670 31 De Coster, W., D'Hert, S., Schultz, D. T., Cruts, M. & Van Broeckhoven, C.  
671 NanoPack: visualizing and processing long-read sequencing data. *Bioinformatics* **34**,  
672 2666-2669, doi:10.1093/bioinformatics/bty149 (2018).
- 673 32 Li, H. Minimap2: pairwise alignment for nucleotide sequences. *Bioinformatics* **34**,  
674 3094-3100, doi:10.1093/bioinformatics/bty191 (2018).
- 675 33 Li, H. *et al.* The Sequence Alignment/Map format and SAMtools. *Bioinformatics* **25**,  
676 2078-2079, doi:10.1093/bioinformatics/btp352 (2009).
- 677 34 Quinlan, A. R. & Hall, I. M. BEDTools: a flexible suite of utilities for comparing  
678 genomic features. *Bioinformatics* **26**, 841-842, doi:10.1093/bioinformatics/btq033  
679 (2010).
- 680 35 Silva, G. G. *et al.* Combining de novo and reference-guided assembly with  
681 scaffold\_builder. *Source Code Biol Med* **8**, 23-23, doi:10.1186/1751-0473-8-23  
682 (2013).
- 683 36 Marçais, G. *et al.* MUMmer4: A fast and versatile genome alignment system. *PLOS*  
684 *Computational Biology* **14**, e1005944, doi:10.1371/journal.pcbi.1005944 (2018).
- 685 37 Katoh, K., Misawa, K., Kuma, K. i. & Miyata, T. MAFFT: a novel method for rapid  
686 multiple sequence alignment based on fast Fourier transform. *Nucleic Acids*  
687 *Research* **30**, 3059-3066, doi:10.1093/nar/gkf436 (2002).

688 38 Minh, B. Q. *et al.* IQ-TREE 2: New Models and Efficient Methods for Phylogenetic  
689 Inference in the Genomic Era. *Molecular Biology and Evolution* **37**, 1530-1534,  
690 doi:10.1093/molbev/msaa015 (2020).  
691

## 692 **Figure Legends**

### 693 **Figure 1**

694 A) DNA was extracted from blood and sequenced with Nanopore's LSK109 on an m1kb  
695 before analysis and assembly using Flye and polishing with medaka. B) Read length  
696 histograms for the dataset demonstrating total throughput (blue) and ASFV reads throughput  
697 (orange) C) Normalized counts by dataset of reads for total throughput (blue) and ASFV  
698 reads throughput (orange). D) Throughput over time for total read count (blue) and ASFV  
699 read count (orange).

### 700 **Figure 2**

701 A) Design of the tiled primer scheme for ASFV with ~7kb amplicons and ~1kb overlaps. B)  
702 Predicted primer binding in correct region for representative ASFV genotypes. C) Workflow  
703 with extraction from blood, PCR amplification of primer pools, pooling, sequencing and  
704 bioinformatic analysis D) Coverage of one sample (PHL-3142) amplified with either evenly  
705 represented primer pairs (purple) or optimized proportions of primer pairs (green). E)  
706 Tapestation capillary electrophoresis of amplified pools of two different samples, the low  
707 quality PHL-126 and the high quality PHL-261, and statistics of the resulting assemblies of  
708 each of these. F) Coverage of amplicons using optimized primer concentrations for the two  
709 samples from figure 1E. G) Impact of post-amplification DIN on proportion of reads <3kb in  
710 length, essentially wasted sequencing capacity, using R9.4 flow cells and LSK-109  
711 (magenta) or R10.4 and LSK-110 (blue). Semilog fit analysis shows an R squared  
712 correlation of 0.6420 or 0.7244, for R9.4\_109 and R10.4\_110, respectively. H) Association  
713 between overall throughput >3kb and number of gaps in final assembly using HAC  
714 (black/bold) and SAC (grey/faint). A log-log analysis shows an R squared correlation of  
715 0.9680 and 0.9358 for HAC and SAC, respectively. PHL-126 is highlighted in orange and  
716 PHL-261 in blue. I) Assembly accuracy based on proportion of mismatches against  
717 reference (MN715134.1), with lines showing Q40 and Q50 PHRED scores. J) Assembly

718 accuracy based on proportion of indels against reference (MN715134.1), with lines showing  
719 Q30 and Q40 PHRED scores. A&C Created with BioRender.com

### 720 **Figure 3**

721 A) Directed acyclic graph showing the steps the Lilo pipeline takes during assembly. The  
722 graph has been simplified to show assembly of a genome containing 2 amplicons  
723 (amplicon\_01 and amplicon\_n) for a single sample. B) Quast results for genomes  
724 sequenced with tiled amplicons or from shotgun sequencing on R9.4 flow cells using SQK-  
725 LSK109. Note PHL-10 and PHL-30 were sequenced with an earlier version of the primer  
726 scheme with one primer different and are expected to have a 25bp gap C) Nucmer  
727 alignment of PHL-261 genomes assembled from WGS or Lilo tiled assembly. D) Nucmer  
728 alignment of PHL-237 genomes assembled from WGS or Lilo tiled assembly. Figure 4

729 B) IGV image showing alignment of genomes assembled with Lilo or Artic (top) and  
730 assemblies and reads for a single sample (PHL-10) aligned to a reference (MN715134.1).  
731 This image shows a likely real indel present in all assemblies and supported by the reads. C)  
732 as in B, but showing an indel common in Lilo assemblies and missing in Artic assemblies  
733 and the reference. D) as in B, but showing a long homopolymer with poor consensus from  
734 the reads and inconsistent results in assemblies. E, F & G) Examples of indels specific to the  
735 Artic pipeline assemblies which do not agree with the reference.

### 736 **Figure 5**

737 Maximum likelihood trees for our R9.4/SQK-LSK109 genomes and A) all available ASFV  
738 genomes downloaded from NCBI (09/11/2021) or B) those specifically clustering with  
739 genotype II.

740

741

**A**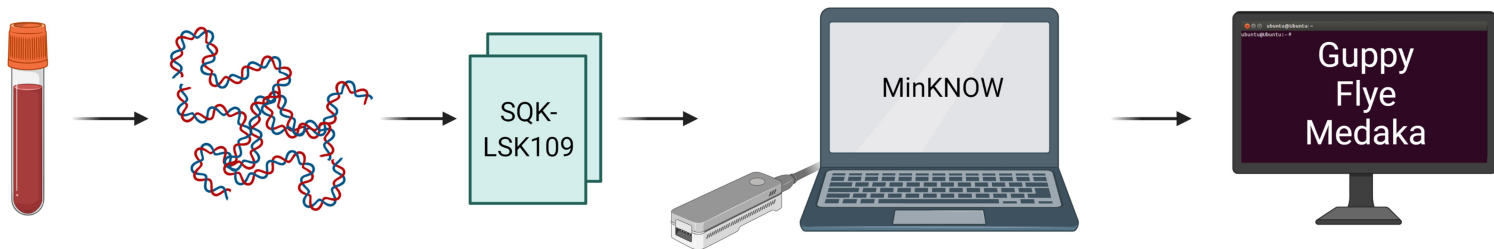**B**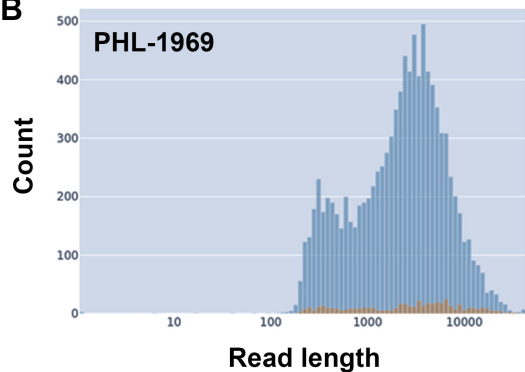**C**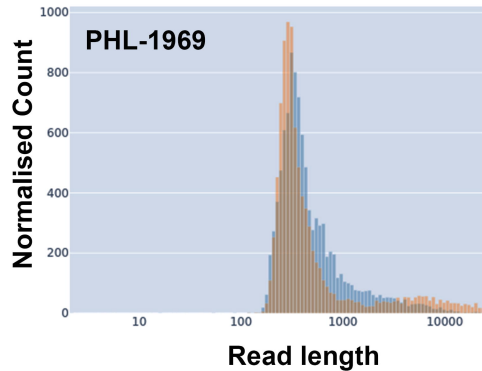**D**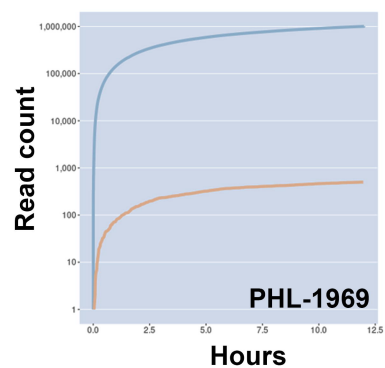



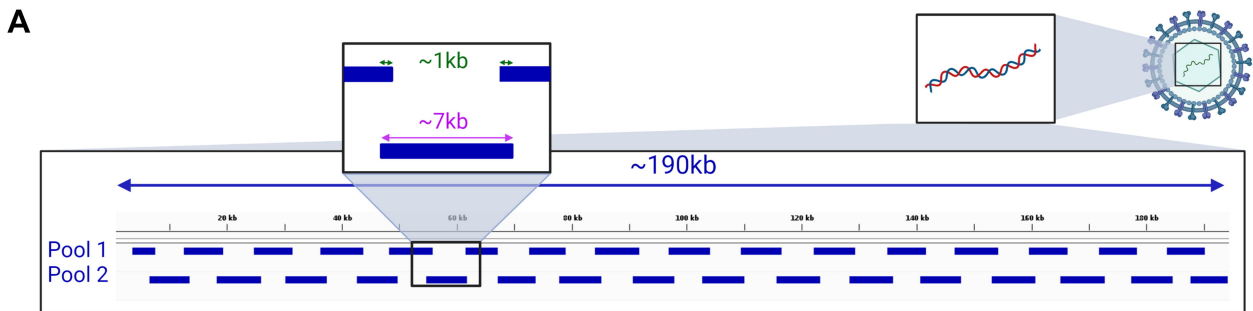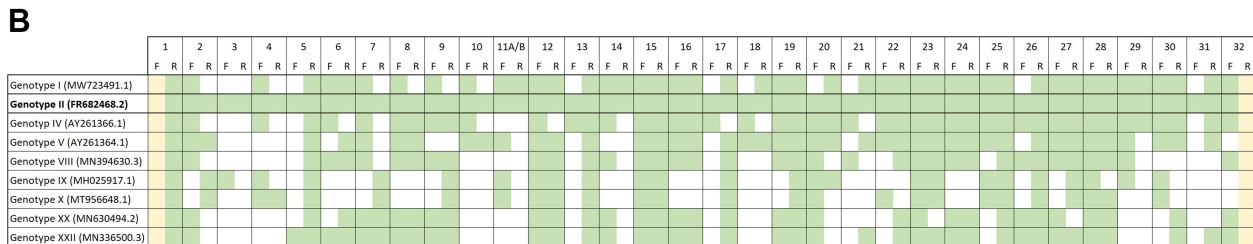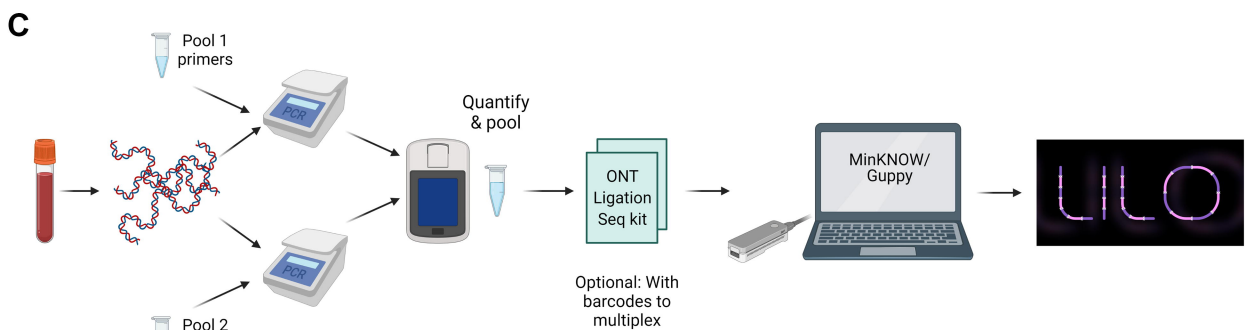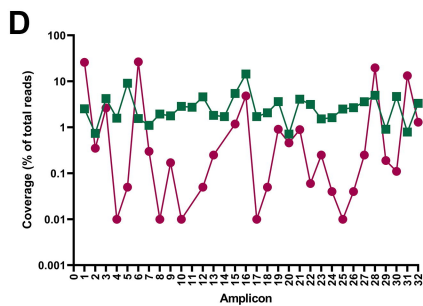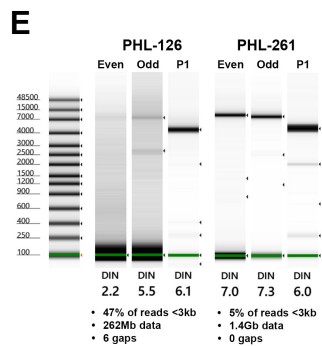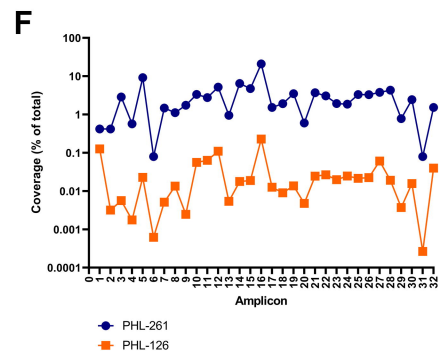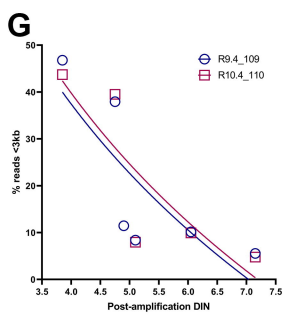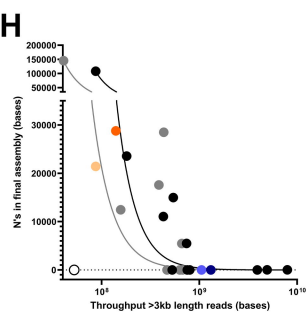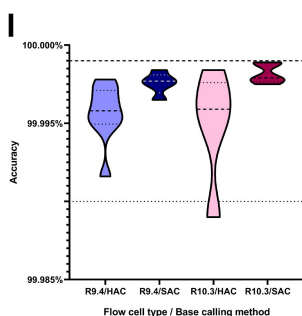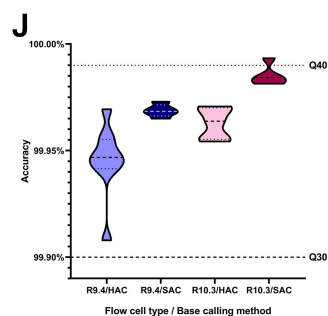



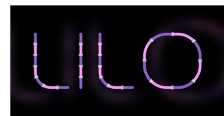

**A**

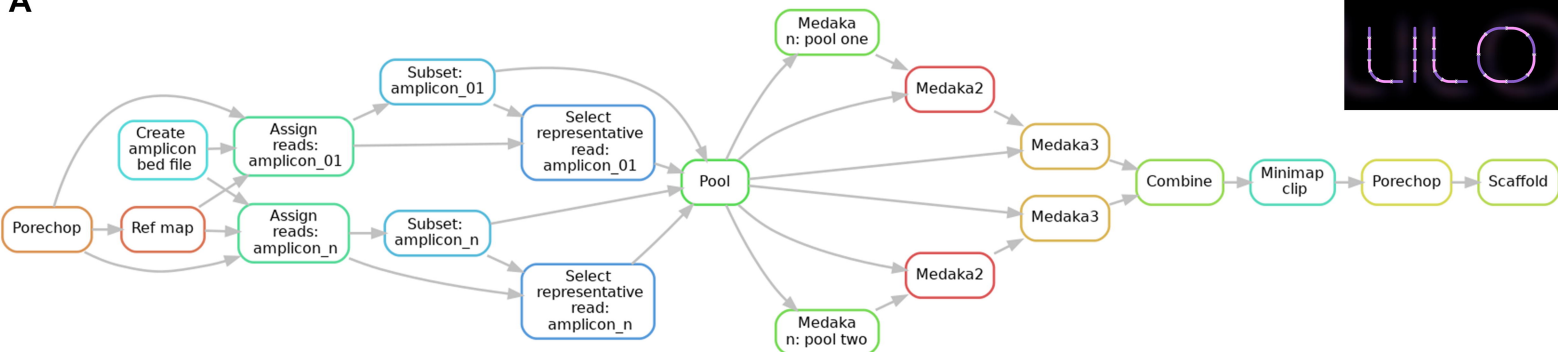

**B**

|                                          |     |       |     |       | Mismatches/<br>100kb | Indels/<br>100kb | % of genome<br>N's | Post-amp<br>DIN | % reads<br><3kb | Total<br>Mismatches | Total<br>Indels | Assembled<br>Genome Length |
|------------------------------------------|-----|-------|-----|-------|----------------------|------------------|--------------------|-----------------|-----------------|---------------------|-----------------|----------------------------|
| <b>Whole genome sequences</b>            |     |       |     |       |                      |                  |                    |                 |                 |                     |                 |                            |
| PHL-100                                  | 109 | R9.4  | HAC | LILO  | 63.54                | 578.23           | 0                  |                 |                 | 120                 | 1,092           | 191,202                    |
| PHL-237                                  | 109 | R9.4  | HAC | LILO  | 17.90                | 102.12           | 0                  |                 |                 | 34                  | 194             | 201,056                    |
| PHL-261                                  | 109 | R9.4  | HAC | LILO  | 10.04                | 199.26           | 0                  |                 |                 | 19                  | 377             | 189,291                    |
| PHL-2842                                 | 109 | R9.4  | HAC | LILO  | 9.44                 | 153.74           | 0                  |                 |                 | 18                  | 293             | 192,401                    |
| PHL-1969                                 | 109 | R9.4  | HAC | LILO  | 18.89                | 81.33            | 0                  |                 |                 | 36                  | 155             | 194,709                    |
| <b>Tiled - ARTIC versus LILO</b>         |     |       |     |       |                      |                  |                    |                 |                 |                     |                 |                            |
| PHL-10                                   | 109 | R9.4  | HAC | LILO  | 4.20                 | 24.30            | 0.01               |                 | 14.65           | 8                   | 46              | 189,551                    |
| PHL-10                                   | 109 | R9.4  | HAC | ARTIC | 1.60                 | 38.40            | 2.49               |                 | 14.65           | 3                   | 73              | 194,629                    |
| PHL-30                                   | 109 | R9.4  | HAC | LILO  | 2.60                 | 31.70            | 0.01               |                 | 25.08           | 5                   | 60              | 189,557                    |
| PHL-30                                   | 109 | R9.4  | HAC | ARTIC | 1.60                 | 38.40            | 2.49               |                 | 25.08           | 3                   | 73              | 194,635                    |
| PHL-3142                                 | 109 | R9.4  | HAC | LILO  | 5.30                 | 37.40            | 0                  | 6.70            | 16.71           | 10                  | 71              | 189,861                    |
| PHL-3142                                 | 110 | R9.4  | HAC | LILO  | 3.20                 | 71.10            | 0                  | 4.90            | 11.46           | 6                   | 135             | 190,114                    |
| PHL-3142                                 | 110 | R9.4  | HAC | ARTIC | 1.10                 | 38.40            | 2.40               | 6.70            | 16.71           | 2                   | 73              | 194,631                    |
| <b>Tiled - 109 / R9.4 vs 110 / R10.3</b> |     |       |     |       |                      |                  |                    |                 |                 |                     |                 |                            |
| PHL-126                                  | 109 | R9.4  | HAC | LILO  | 3.70                 | 42.60            | 0                  | 2.40            | 24.37           | 7                   | 81              | 189,902                    |
| PHL-126                                  | 109 | R9.4  | SAC | LILO  | 2.60                 | 25.20            | 0                  | 2.40            | 23.86           | 5                   | 48              | 189,909                    |
| PHL-126                                  | 110 | R10.3 | HAC | LILO  | 4.30                 | 24.20            | 17.84              | 3.85            | 46.80           | 7                   | 39              | 161,294                    |
| PHL-126                                  | 110 | R10.3 | SAC | LILO  | 1.30                 | 9.40             | 11.28              | 3.85            | 43.72           | 2                   | 14              | 190,035                    |
| PHL-233                                  | 109 | R9.4  | HAC | LILO  | 4.80                 | 49.90            | 12.42              | 1.80            | 39.71           | 8                   | 83              | 189,872                    |
| PHL-233                                  | 109 | R9.4  | SAC | LILO  | 2.40                 | 31.90            | 6.57               | 1.80            | 39.50           | 4                   | 53              | 189,520                    |
| PHL-233                                  | 110 | R10.3 | HAC | LILO  | 11.00                | 25.70            | 56.96              | 4.75            | 37.94           | 9                   | 21              | 190,074                    |
| PHL-233                                  | 110 | R10.3 | SAC | LILO  | 2.20                 | 6.70             | 76.42              | 4.75            | 39.52           | 1                   | 3               | 190,087                    |
| PHL-237                                  | 109 | R9.4  | HAC | LILO  | 8.10                 | 47.20            | 2.98               | 5.15            | 18.92           | 15                  | 87              | 184,406                    |
| PHL-237                                  | 109 | R9.4  | SAC | LILO  | 2.20                 | 22.80            | 2.88               | 5.15            | 18.62           | 4                   | 42              | 189,818                    |
| PHL-237                                  | 110 | R10.3 | HAC | LILO  | 1.60                 | 28.40            | 0                  | 6.05            | 10.16           | 3                   | 54              | 190,090                    |
| PHL-237                                  | 110 | R10.3 | SAC | LILO  | 1.00                 | 10.50            | 0                  | 6.05            | 9.94            | 2                   | 20              | 189,962                    |
| PHL-2607                                 | 109 | R9.4  | HAC | LILO  | 2.20                 | 40.90            | 5.84               | 1.35            | 41.08           | 4                   | 73              | 189,585                    |
| PHL-2607                                 | 109 | R9.4  | SAC | LILO  | 3.50                 | 23.80            | 9.28               | 1.35            | 40.69           | 6                   | 41              | 189,503                    |
| PHL-2607                                 | 110 | R10.3 | HAC | LILO  | 3.70                 | 23.50            | 9.28               | 5.10            | 8.40            | 6                   | 38              | 161,518                    |
| PHL-2607                                 | 110 | R10.3 | SAC | LILO  | 2.50                 | 12.40            | 15.00              | 5.10            | 7.95            | 4                   | 20              | 189,995                    |
| PHL-261                                  | 109 | R9.4  | HAC | LILO  | 4.70                 | 43.70            | 0                  | 6.15            | 11.37           | 9                   | 83              | 189,878                    |
| PHL-261                                  | 109 | R9.4  | SAC | LILO  | 1.60                 | 22.60            | 0                  | 6.15            | 10.95           | 3                   | 43              | 189,881                    |
| PHL-261                                  | 110 | R10.3 | HAC | LILO  | 3.20                 | 21.10            | 0                  | 7.15            | 5.55            | 6                   | 40              | 189,886                    |
| PHL-261                                  | 110 | R10.3 | SAC | LILO  | 2.10                 | 8.40             | 0                  | 7.15            | 4.78            | 4                   | 16              | 189,933                    |

**C**

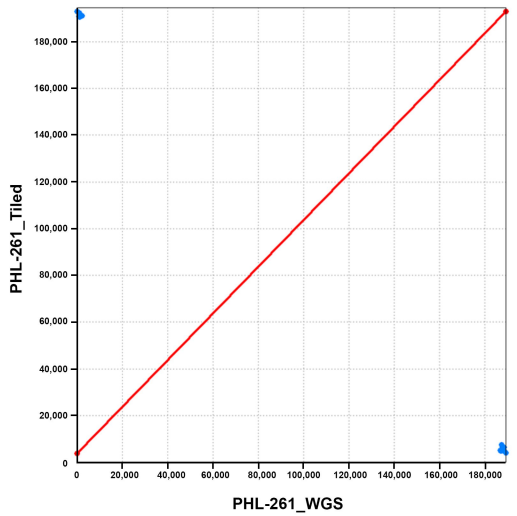

**D**

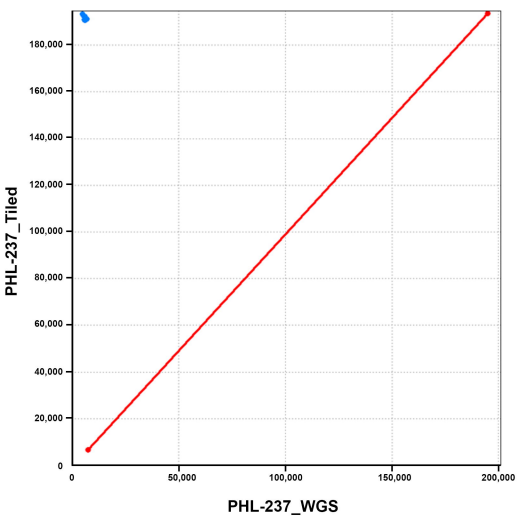

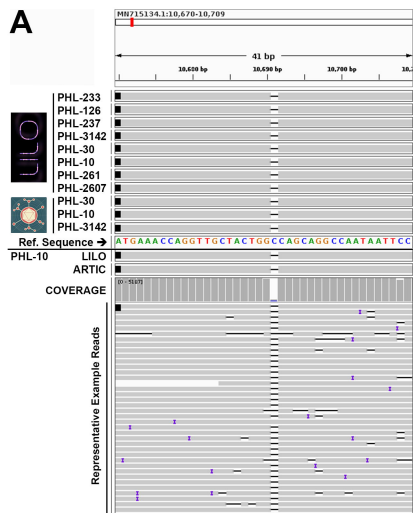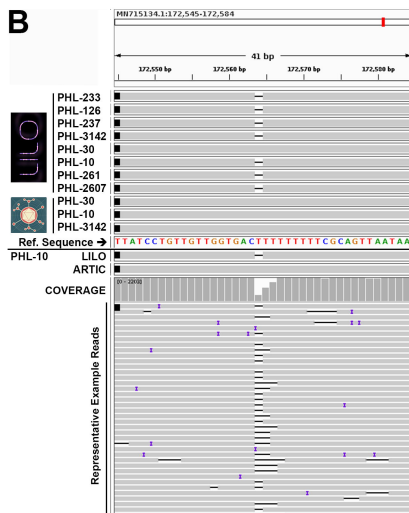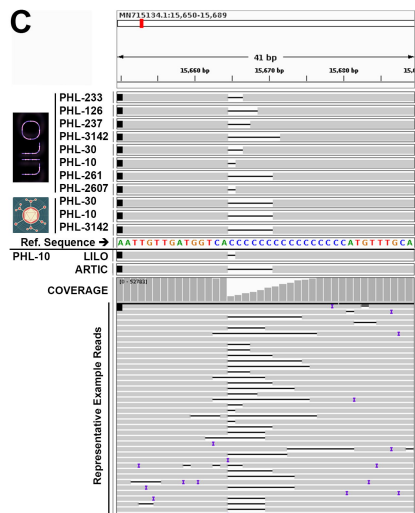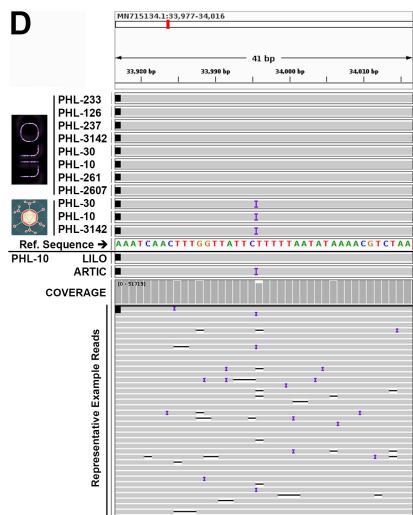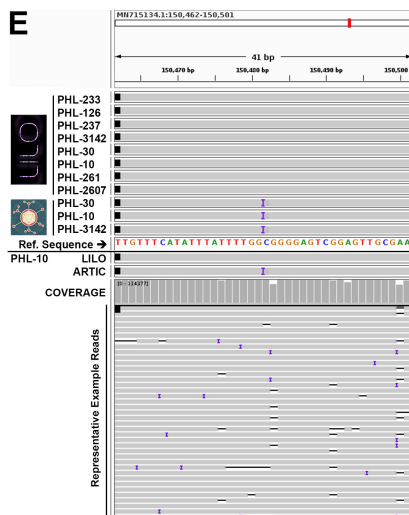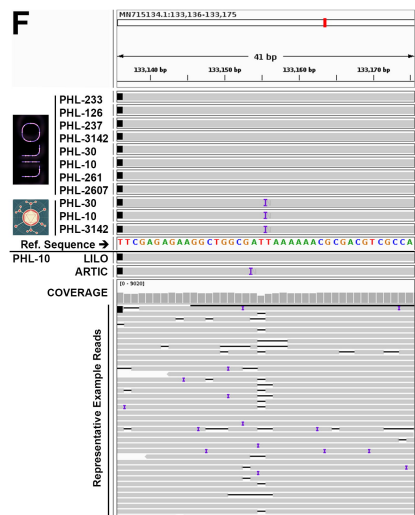

Source: https://www.biorxiv.org/content/10.1101/2021.12.01.470769v1.full.pdf
